# Supplementary material for: Prognostic Value of Dynamic Contrast-Enhanced MRI-Derived Pharmacokinetic Variables in Glioblastoma Patients: Analysis of Contrast-Enhancing Lesions and Non-Enhancing T2 High-Signal Intensity Lesions
Source: PubMed Central journal article supplement — Korean J Radiol. 2020 Apr 27;21(6):707–16. doi: 10.3348/kjr.2019.0629 (PMC7231611; doi:10.3348/kjr.2019.0629), 2020-04-27
Supplement: kjr-21-707-s001.pdf [file kjr-21-707-s001.pdf]

**Supplementary Table 1. MR Scan Parameters**

| Scan Parameters               | Verio/Skyra (Siemens) |
|-------------------------------|-----------------------|
| Field strength (T)            | 3.0                   |
| Head coil channel             | 32                    |
| <b>T1</b>                     |                       |
| TR (ms)                       | 558                   |
| TE (ms)                       | 9.8                   |
| FA (°)                        | 70                    |
| NEX                           | 1                     |
| Matrix                        | 384 x 187             |
| Section thickness (mm)        | 5                     |
| FOV (mm)                      | 175 x 220             |
| <b>3D MPRAGE</b>              |                       |
| TR (ms)                       | 1370–1600             |
| TE (ms)                       | 1.9–2.8               |
| FA (°)                        | 9                     |
| NEX                           | 1                     |
| Matrix                        | 256 x 232             |
| Section thickness (mm)        | 1                     |
| FOV (mm)                      | 220 x 250             |
| <b>T2</b>                     |                       |
| TR (ms)                       | 5100–5160             |
| TE (ms)                       | 89–91                 |
| FA (°)                        | 124–150               |
| NEX                           | 3                     |
| Matrix                        | 640 x 510–580         |
| Section thickness (mm)        | 5                     |
| FOV (mm)                      | 199 x 220             |
| <b>FLAIR</b>                  |                       |
| TR (ms)                       | 8000–9000             |
| TE (ms)                       | 90–97                 |
| Inversion time (ms)           | 2300–2500             |
| FA(°)                         | 130–150               |
| NEX                           | 1                     |
| Matrix                        | 384 x 348             |
| Section thickness (mm)        | 5                     |
| FOV (mm)                      | 199 x 220             |
| <b>DCE*</b>                   |                       |
| TR (ms)                       | 2.8                   |
| TE (ms)                       | 1.0                   |
| FA (°)                        | 10                    |
| NEX                           | 1                     |
| Matrix                        | 192 x 192             |
| Section thickness (mm)        | 3                     |
| FOV (mm)                      | 240 x 240             |
| Voxel size (mm <sup>3</sup> ) | 1.25 x 1.25 x 3       |
| Pixel bandwidth (Hz)          | 789                   |
| Total acquisition time        | 5 min 8 sec           |

\*DCE MR imaging was acquired after intravenous administration of gadobutrol (Gadovist; Bayer AG) at dose of 0.1 mmol/kg of body weight, at rate of 4 mL/s using power injector (MEDRAD® Spectris Solaris; Bayer). After contrast, 30 mL saline bolus was injected at same injection rate. DCE = dynamic contrast-enhanced, FA = flip angle, FLAIR = fluid-attenuated inverse recovery, FOV = field of view, MR = magnetic resonance, NEX = number of excitation, T = Tesla, TE = echo time, TR = repetition time, 3D MPRAGE = three-dimensional magnetization-prepared rapid acquisition with gradient echo
